# Supplementary material for: Potent pro-apoptotic combination therapy is highly effective in a broad range of cancers
Source: PubMed Central journal article supplement (PMC8901660; doi:10.1038/s41418-021-00869-x), 2021-09-17

1 **Supplementary Information for**

2 **Potent pro-apoptotic combination therapy is highly effective in a broad range of cancers**

3 Antonella Montinaro<sup>1\*</sup>, Itziar Areso Zubiaur<sup>1\*</sup>, Julia Saggau<sup>2,3</sup>, Anna-Laura Kretz<sup>4</sup>, Rute M.M. Ferreira<sup>1</sup>,  
4 Omar Hassan<sup>2,3</sup>, Ella Kitzig<sup>4</sup>, Ines Müller<sup>5</sup>, Mona A. El-Bahrawy<sup>6</sup>, Silvia von Karstedt<sup>1,2,7,8</sup>, Dagmar  
5 Kulms<sup>5</sup>, Gianmaria Liccardi<sup>3</sup>, Johannes Lemke<sup>4</sup> and Henning Walczak<sup>1,2,3,9</sup>

6  
7 <sup>1</sup>Centre for Cell Death, Cancer, and Inflammation (CCCI), UCL Cancer Institute, University College London, 72 Huntley  
8 Street, London WC1E 6DD, UK

9 <sup>2</sup>CECAD Cluster of Excellence, University of Cologne, 50931 Cologne, Germany.

10 <sup>3</sup>Institute of Biochemistry I, Medical Faculty, Joseph-Stelzmann-Str. 44, University of Cologne, 50931 Cologne, Germany

11 <sup>4</sup>Department of General and Visceral Surgery, Ulm University Hospital, Albert-Einstein-Allee 23, 89081 Ulm, Germany.

12 <sup>5</sup>Experimental Dermatology, Department of Dermatology, Technical University Dresden, Dresden, Germany

13 <sup>6</sup>Department of Histopathology, Imperial College London, London W12 0NN, UK

14 <sup>7</sup>Department of Translational Genomics, Center of Integrated Oncology Cologne-Bonn, Medical Faculty, University of  
15 Cologne, 50931 Cologne, Germany

16 <sup>8</sup>Center for Molecular Medicine Cologne, Medical Faculty, University Hospital of Cologne, 50931 Cologne, Germany.

17 <sup>9</sup>Correspondence to: Henning Walczak PhD, UCL Cancer Institute & Institute of Biochemistry I, University of Cologne;  
18 Email: [h.walczak@ucl.ac.uk](mailto:h.walczak@ucl.ac.uk), Phone: +44 759 025 0679 or [h.walczak@uni-koeln.de](mailto:h.walczak@uni-koeln.de), Phone: +49 221 478 81966

19 \*These authors contributed equally to this study.

20  
21 The file includes Supplementary Figures 1 to 6.

22

23 **Supplementary Figure 1. The CDK9-inhibitory activity of dinaciclib and NVP-2 is required and**  
24 **sufficient for TRAIL sensitization. a** A549 cells were transiently transfected with the indicated  
25 siRNAs. After 48 hr, transfected cells were stimulated with iz-huTRAIL at different concentrations.  
26 Cell death was measured as a function of time by Sytox Green positivity. The mean of four technical  
27 replicates of Sytox positive cells/well of one representative out of three independent experiments is  
28 shown. Representative images of indicated measurements are depicted with the corresponding  
29 percentage of dead cells. Scale bars, 200  $\mu$ m. Representative western blots of knockdown efficiency  
30 are shown. **b** A549 cells were treated with NVP-2 (25 nM) or dinaciclib (25 nM) for the indicated times.  
31 Cells were lysed and subjected to western blotting. One representative of two independent experiments  
32 is shown. **c** Panel of human carcinoma cell lines. **d** Human carcinoma cell lines were treated with DMSO  
33 or dinaciclib (25nM) for 1 hr before iz-huTRAIL was added at the indicated concentrations. Cell  
34 viability was determined by CellTiter-Glo after 24 hr. Data are mean  $\pm$  SEM,  $n \geq 3$ . **e** CDK9 protein  
35 intensity data of lung cancer patients quantified by label-free mass spectrometry across paired normal  
36 and tumor tissue. **f** Human carcinoma cell lines were treated for up to 48 hr with DMSO, carboplatin  
37 (10  $\mu$ M), cisplatin (10  $\mu$ M), 5-FU (10  $\mu$ M), paclitaxel (10  $\mu$ M), oxaliplatin (10  $\mu$ M), gemcitabine (1  
38  $\mu$ M), dinaciclib (25 nM) and iz-huTRAIL(10 ng/ml) cell viability was determined by CellTiter-Glo.

39

40 **Supplementary Figure 2. Randomization of KPC tumor-bearing mice.** Tumor volume one week  
41 after subcutaneous injection of  $1 \times 10^6$  KPC cells.

42

43 **Supplementary Figure 3. Randomization of tumor-bearing mice and sensitivity of NSCLC cells**  
44 **to TRAIL-CDK9i combination. a** KP cells were treated with DMSO or dinaciclib (100 nM) for 1 hr  
45 before iz-mTRAIL was added at the indicated concentrations. Cell viability was determined by  
46 CellTiter-Glo after 48 hr. Data are mean  $\pm$  SEM,  $n \geq 3$ . **b** Randomization of KP tumor-bearing mice:  
47 tumor volume one week after intradermal injection of  $0.5 \times 10^6$  KP cells. **c** Tumor burden quantification  
48 by bioluminescence imaging (Photon Flux) one week after injection. Dots represent individual mice  
49 ( $n=11$  per group)  $\pm$  SEM before treatment (after randomization). **d** Histological quantification of tumor

50 burden as the percentage of total lung area occupied by tumor tissue. Representative images of H&E-  
51 stained lung sections (5x magnification) are shown.

52

53 **Supplementary Figure 4. Resistance to chemo- and targeted therapy. a** Gemcitabine-sensitive and  
54 -resistant pancreatic cancer cells were treated with gemcitabine at the indicated concentrations. Cell  
55 viability was quantified after 48 hr. **b** Sorafenib-sensitive and -resistant hepatocellular carcinoma cells  
56 were treated with sorafenib at the indicated concentrations of. Cell viability was quantified after 24 hr.  
57 **c** Mutations in BRAF, NRAS and/or p53 of cell lines included in the melanoma panel are indicated.  
58 Sensitive cells were treated in the presence of the indicated drugs for six months which rendered the  
59 resistant variants of the respective melanoma cell lines. **d** Cell viability of sensitive and resistant  
60 melanoma cells treated for 48 hr with dabrafenib (10  $\mu$ M), trametinib (10 nM), cisplatin (10  $\mu$ M) or  
61 DMSO as control. Data are mean  $\pm$  SEM,  $n \geq 3$ .

62

63 **Supplementary Figure 5. Dynamic BH3 profiling of drug-sensitive- and drug-resistant melanoma**  
64 **cells. a** Trametinib-sensitive and -resistant SKmel2 **b**, Dabrafenib-sensitive and -resistant Malme3M, **c**  
65 cisplatin-sensitive and -resistant IGR-37 cells were treated for 48 hr with dabrafenib (10  $\mu$ M),  
66 trametinib (10 nM) or cisplatin (10  $\mu$ M), respectively, or for 12 hr with a combination of dinaciclib (25  
67 nM) and TRAIL (10 ng/ml). Cells were subsequently permeabilized, stained with the fluorescent dye  
68 JC-1 and incubated in the absence or presence of the Bim-derived BH3-only peptide employed at  
69 different concentrations (0.1 – 3.0  $\mu$ M) to induce mitochondrial depolarization and MOMP. Results are  
70 expressed as  $\Delta\%$  priming (increase in priming compared to untreated cells, left panels. Relative  
71 Fluorescent Unit at 590 nm average and standard deviation from triplicated wells of a 384-well plate  
72 (left panels).

73

74 **Supplementary Figure 6. Concomitant downregulation of cFLIP and Mcl-1 in both, drug-**  
75 **sensitive and -resistant melanoma cells. a** Dabrafenib-sensitive and -resistant Malme3M, **b** cisplatin-  
76 sensitive and -resistant IGR-37 cells were treated with dabrafenib (10  $\mu$ M), trametinib (10 nM) or  
77 cisplatin (10  $\mu$ M), respectively, or with dinaciclib (25 nM) for the indicated times. Cells were lysed and

78 subjected to western blotting with antibodies specific for the indicated antigens. One representative of  
79 two independent experiments is shown. \* indicates an unspecific band.

Supplementary Fig. 1

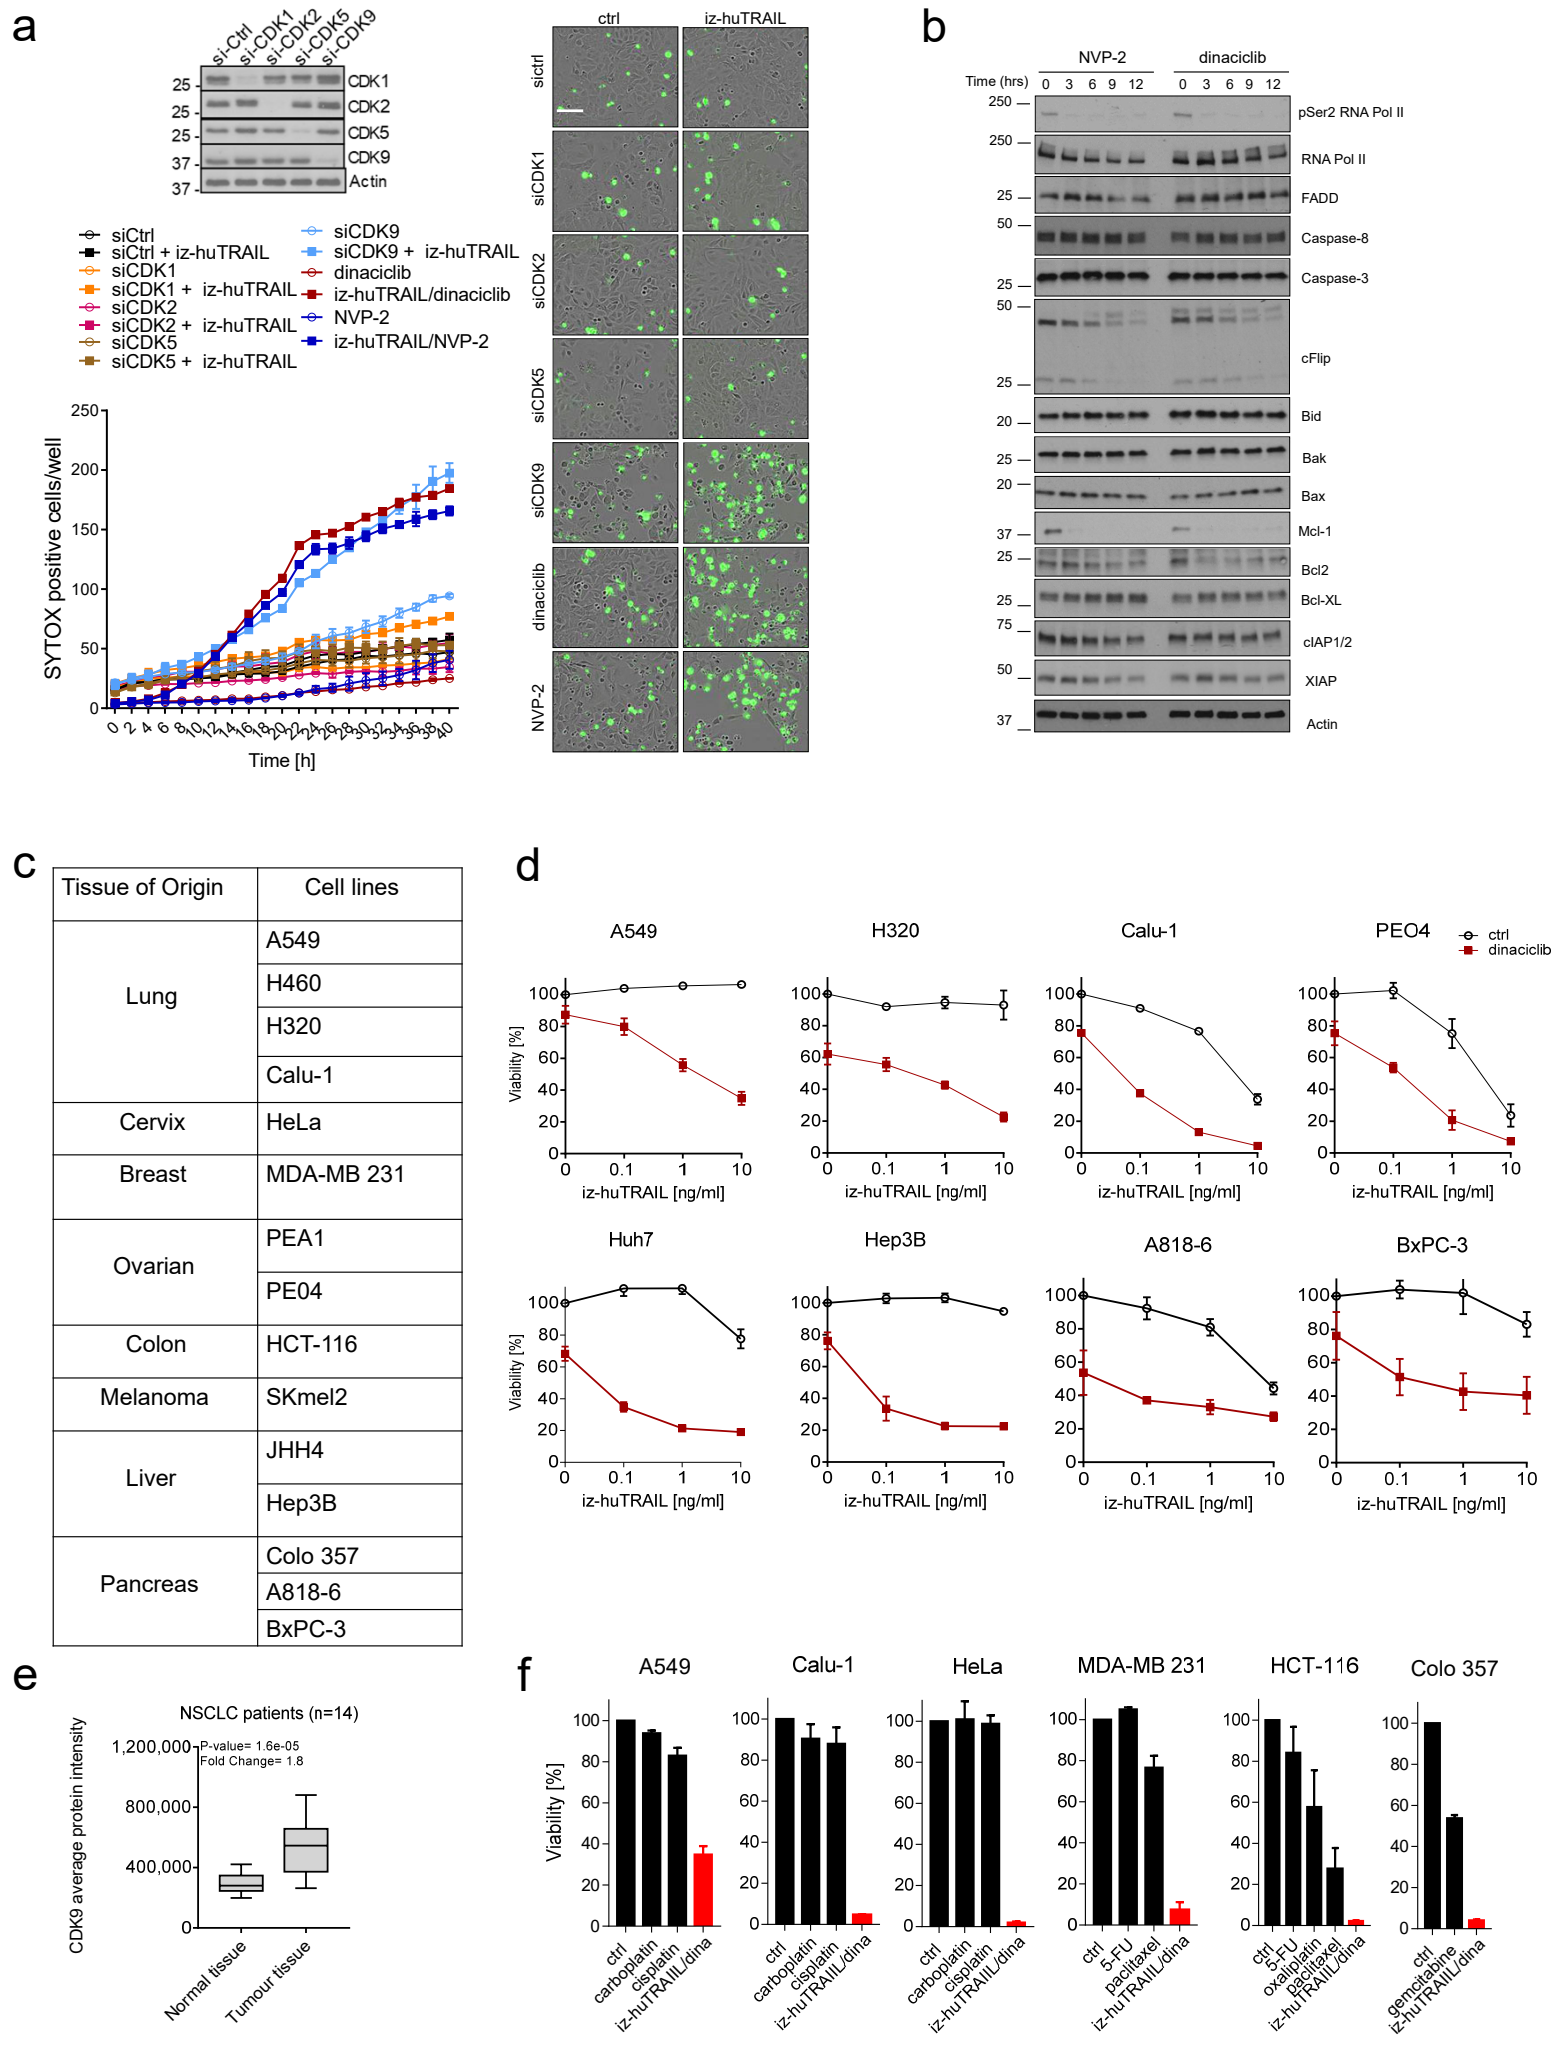

Supplementary Fig. 2

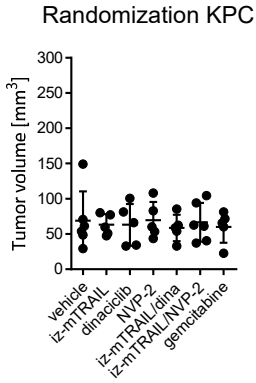

Supplementary Fig. 3

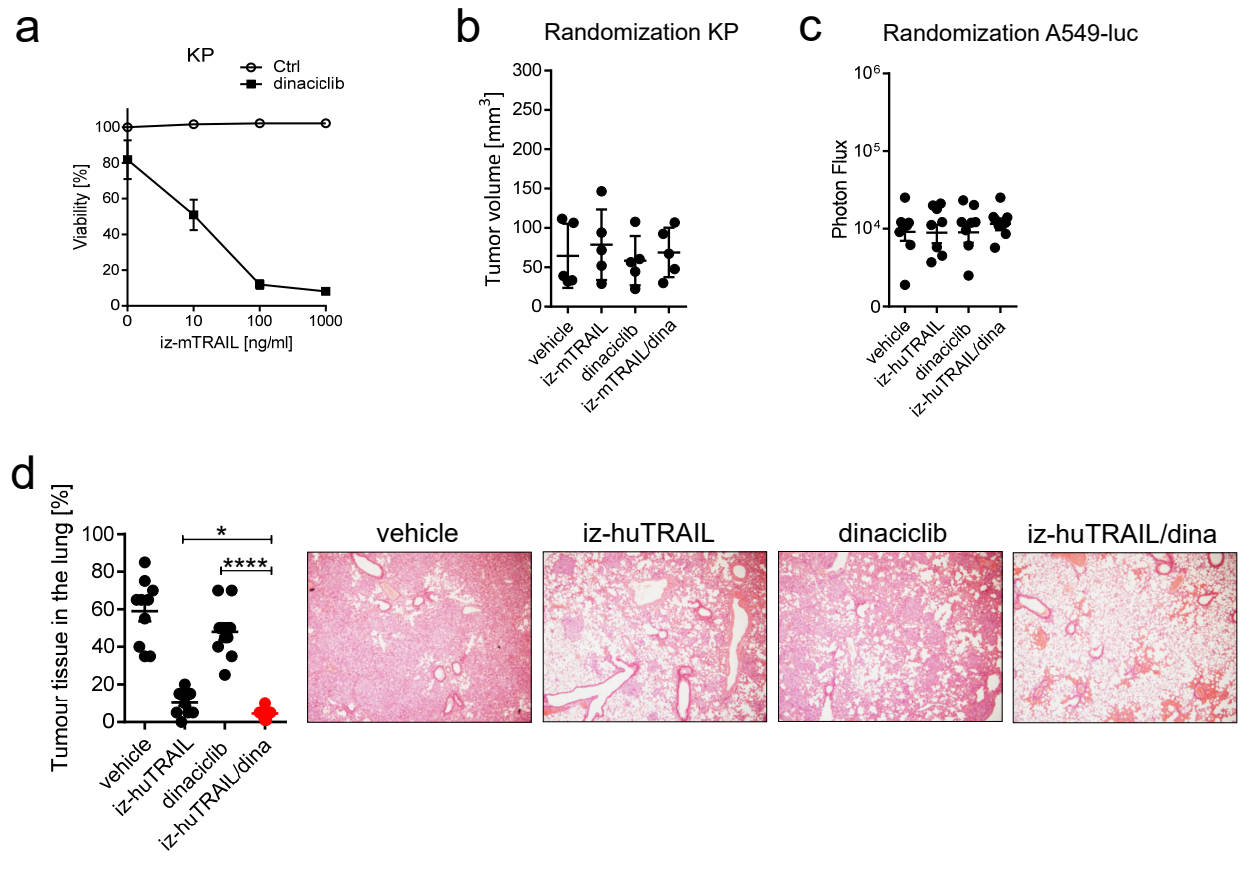

Supplementary Fig. 4

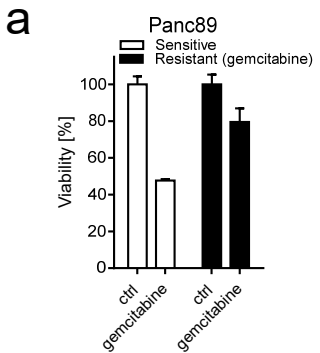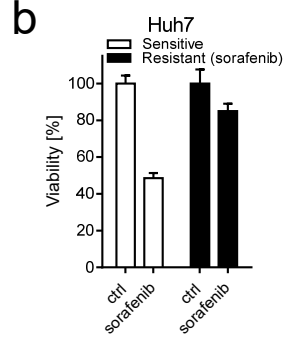

**c**

| Cell line | BRAFmut | NRASmut | p53mut | Resistant to |
|-----------|---------|---------|--------|--------------|
| Malme3M   | mut     | wt      |        |              |
| Malme3M   | mut     | wt      |        | dabrafenib   |
| WM3248    | mut     | wt      | mut    |              |
| WM3248    | mut     | wt      | mut    | dabrafenib   |
| SKmel2    | wt      | mut     |        |              |
| SKmel2    | wt      | mut     |        | trametinib   |
| SKmel147  | wt      | mut     |        |              |
| SKmel147  | wt      | mut     |        | trametinib   |
| IGR-37    | mut     | wt      |        |              |
| IGR-37    | mut     | wt      |        | cisplatin    |
| A375      | mut     | wt      |        |              |
| A375      | mut     | wt      |        | cisplatin    |

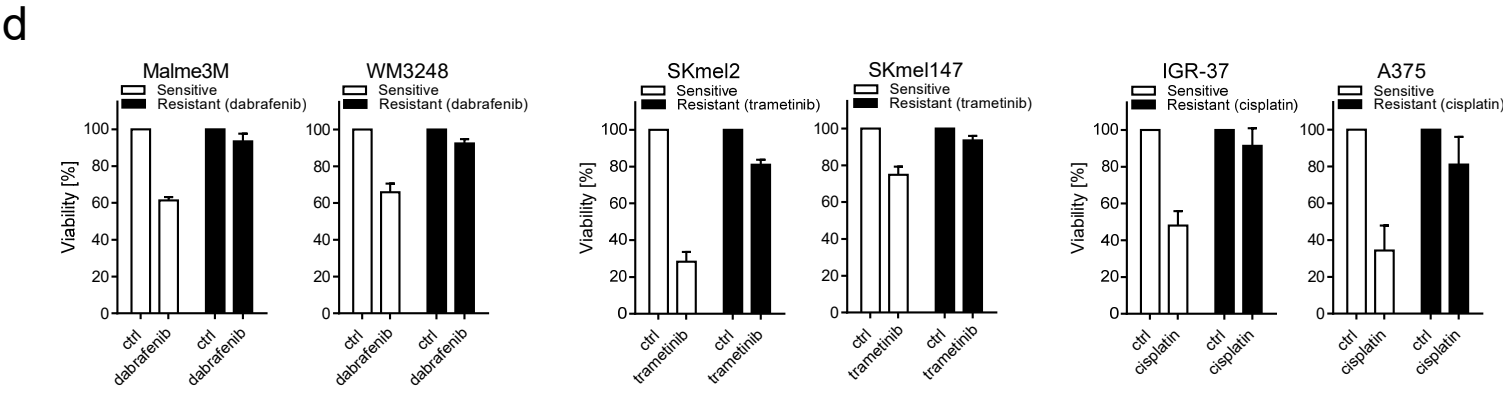



Supplementary Fig. 5

SKmel2

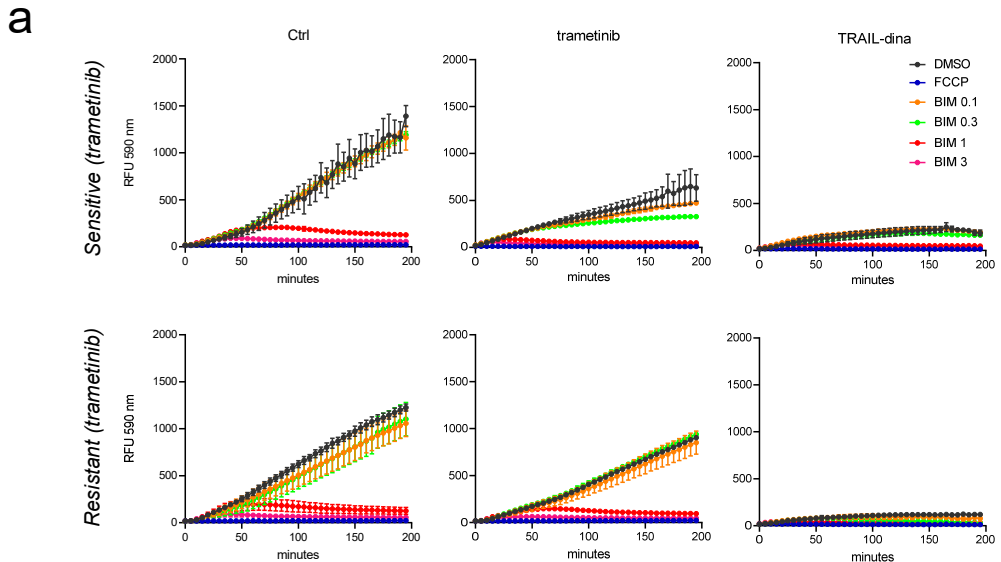

**b**

Malme3M

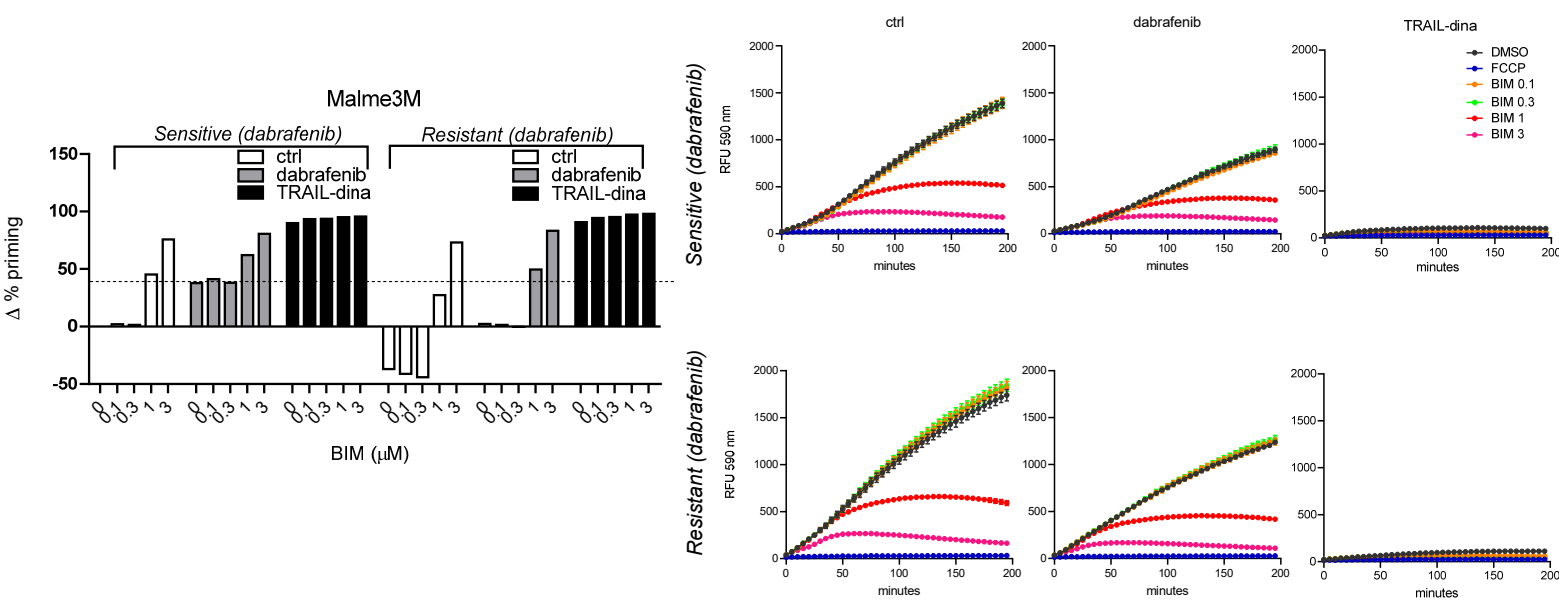

**c**

IGR-37

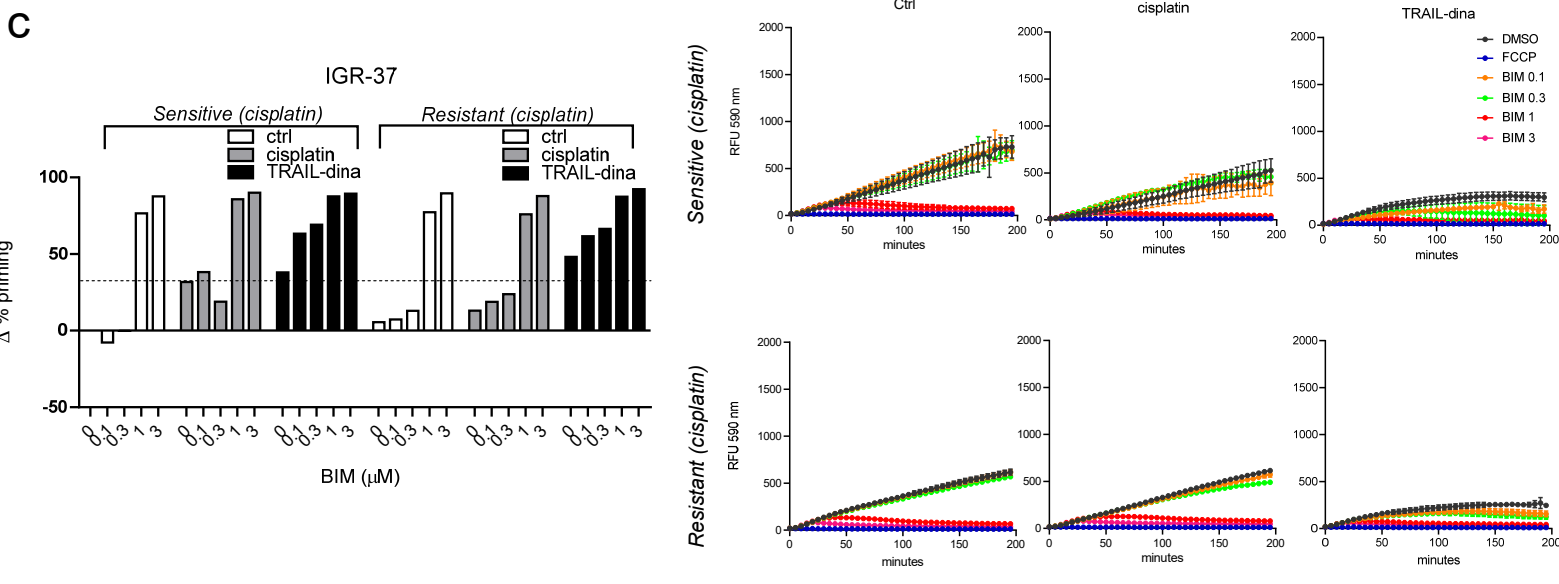

Supplementary Fig. 6

**a**

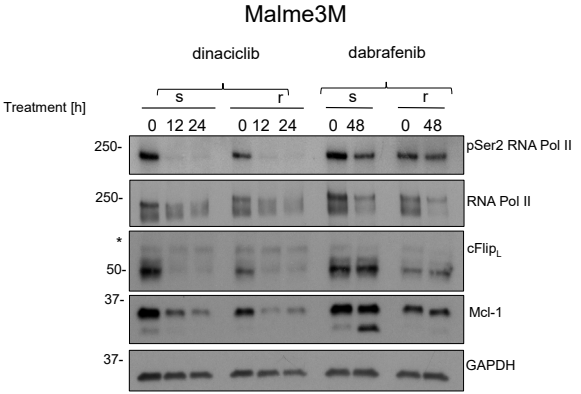

**b**

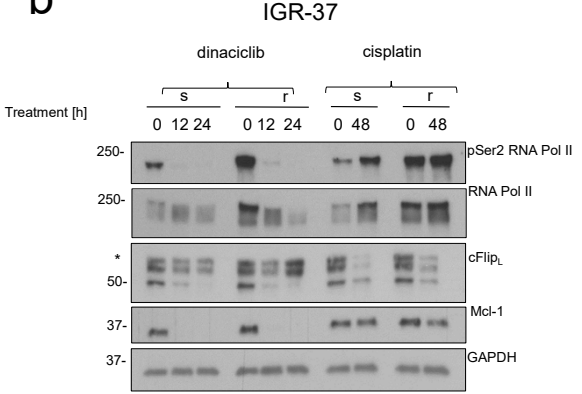

Supplement: 41418_2021_869_MOESM1_ESM.pdf [file 41418_2021_869_MOESM1_ESM.pdf]
